# Supplementary material for: COVID-19 Vaccines: How Efficient and Equitable Was the Initial Vaccination Process?
Source: MDPI journal article supplement (doi:10.3390/vaccines11010011), 2022-12-20
Supplement: s1 [file s1]

Table S1: LMIC and LIC in UNICEF regions with vaccination coverage of >50%

| UNICEF Regions                  | Fully vaccinated<br>">50%" | Out of total |
|---------------------------------|----------------------------|--------------|
| East Asia and Pacific           | 5                          | 12           |
| Eastern and Southern Africa     | 1                          | 19           |
| Eastern Europe and Central Asia | 0                          | 5            |
| Latin America and Caribbean     | 2                          | 5            |
| Middle East and North Africa    | 2                          | 6            |
| South Asia                      | 3                          | 6            |
| West and Central Africa         | 1                          | 22           |
| Total                           | 14                         | 75           |
