# Supplementary material for: COVID-19 Vaccines: How Efficient and Equitable Was the Initial Vaccination Process?
Source: MDPI journal article supplement (doi:10.3390/vaccines11010011), 2022-12-20
Supplement: s1 [file s1]

**Table S2: Top 10 vaccine donor countries around the globe**

| Donor                                                | Donated doses |
|------------------------------------------------------|---------------|
| United States of America                             | 185,505,850   |
| China                                                | 127,475,340   |
| Germany                                              | 111,604,163   |
| France                                               | 74,216,230    |
| Japan                                                | 64,183,490    |
| United Kingdom of Great Britain and Northern Ireland | 57,363,860    |
| Italy                                                | 50,339,570    |
| Spain                                                | 49,878,550    |
| Canada                                               | 26,785,800    |
| Netherlands                                          | 23,824,415    |
