# Supplementary material for: COVID-19 Vaccines: How Efficient and Equitable Was the Initial Vaccination Process?
Source: MDPI journal article supplement (doi:10.3390/vaccines11010011), 2022-12-20
Supplement: s1 [file s1]

Vaccine Procurement Mechanisms - Low Middle Income Countries

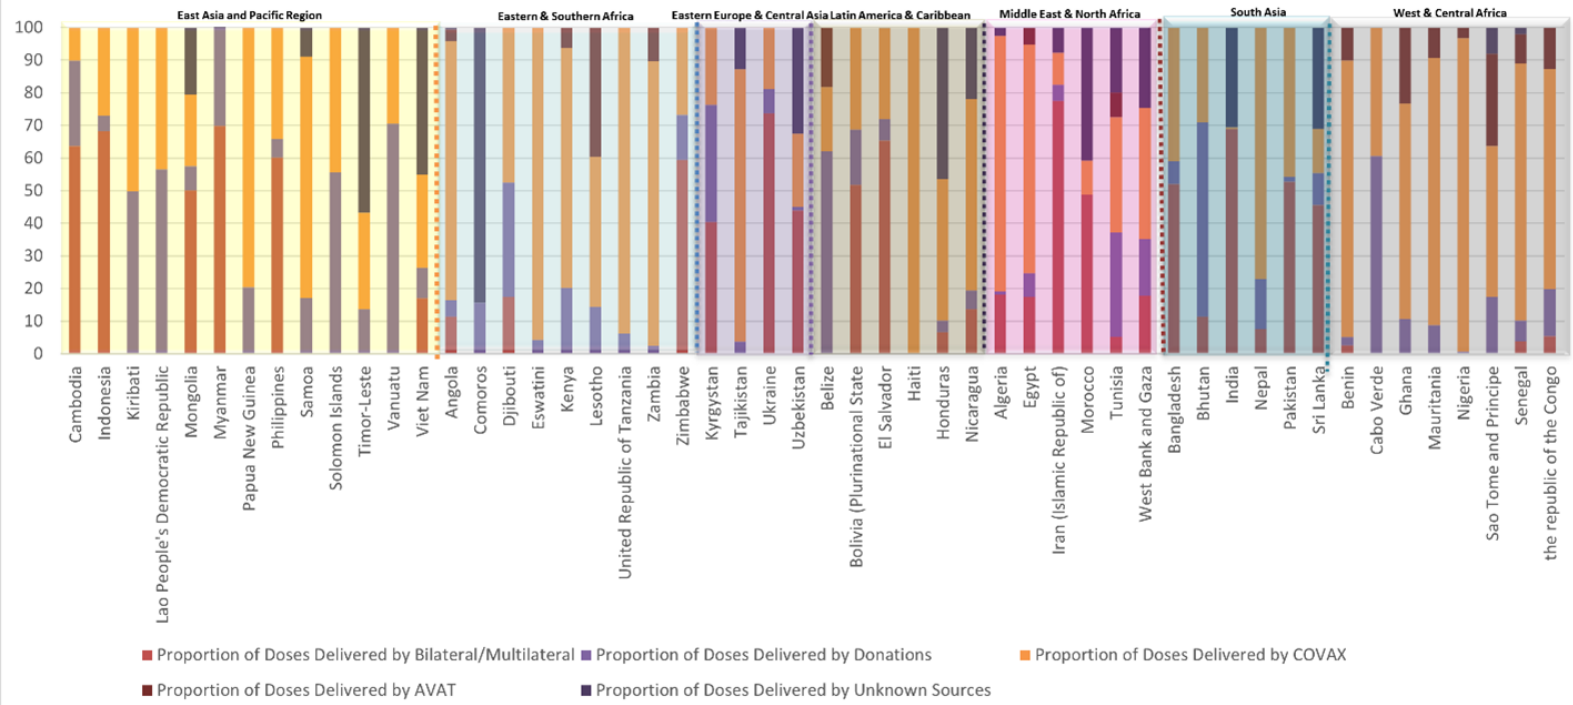

Vaccine Procurement Mechanisms Low Income Countries

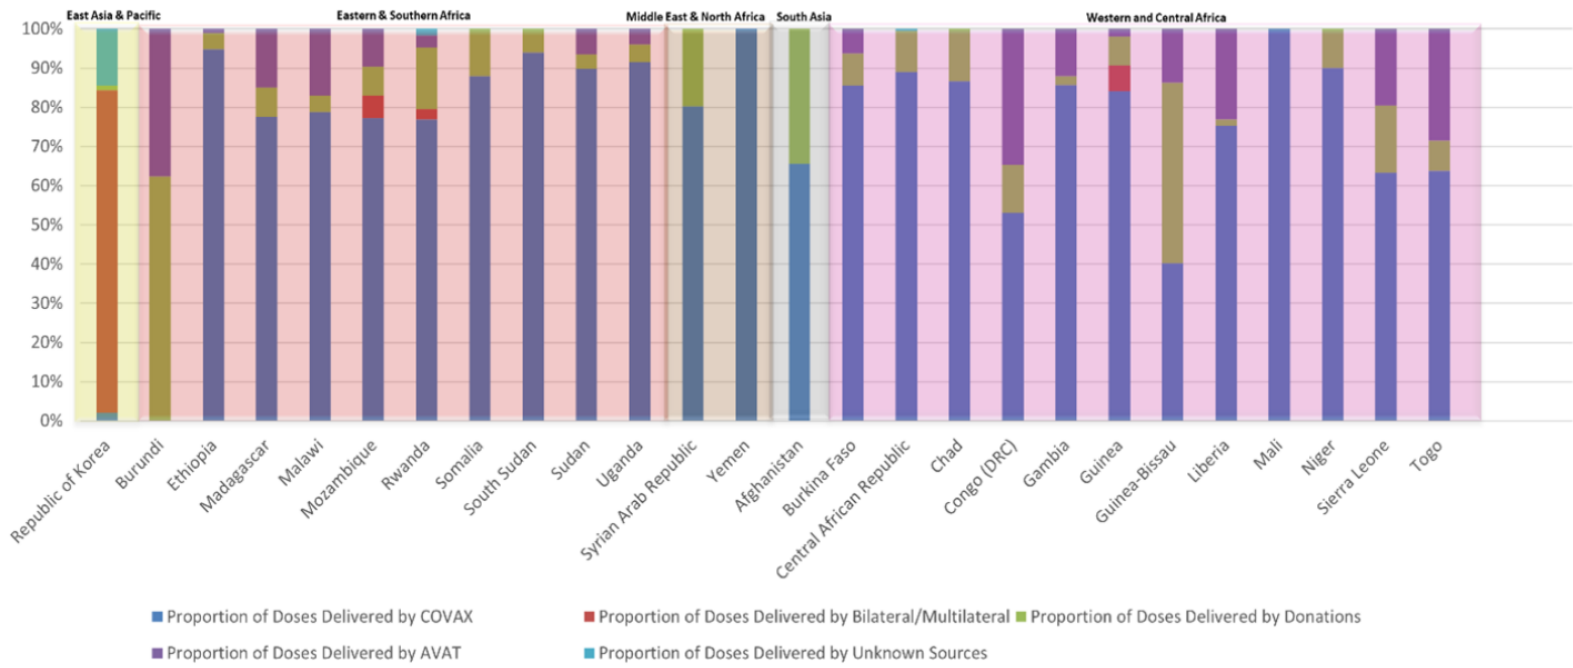

Figure S3: Country level vaccine procurement mechanisms in LMIC and LIC according to UNICEF regions
