# Supplementary material for: COVID-19 Vaccines: How Efficient and Equitable Was the Initial Vaccination Process?
Source: Vaccines (Basel). 2022 Dec 20;11(1):11. doi: 10.3390/vaccines11010011 (PMC9862832; doi:10.3390/vaccines11010011)
Supplement: Supplementary file 1 [file vaccines-11-00011-s001.zip]

Archive with 5 entries (5 files):
- Figure S1 Time trend analysis of vaccines delivered by COVAX.pdf
- Figure S2 Unit price of vaccines for which a manufacturer agreed to supply vaccine in USD.pdf
- Figure S3 Country level vaccine procurement mechanisms in LMIC and LIC according to UNICEF regions.pdf
- Table S1 LMIC and LIC in UNICEF Regions with Vaccination Coverage of 50_.pdf
- Table S2 Top 10 vaccine donor countries around the globe.pdf
