# Supplementary figures and images for: COVID-19 Vaccines: How Efficient and Equitable Was the Initial Vaccination Process?
Source: MDPI journal article supplement (doi:10.3390/vaccines11010011), 2022-12-20

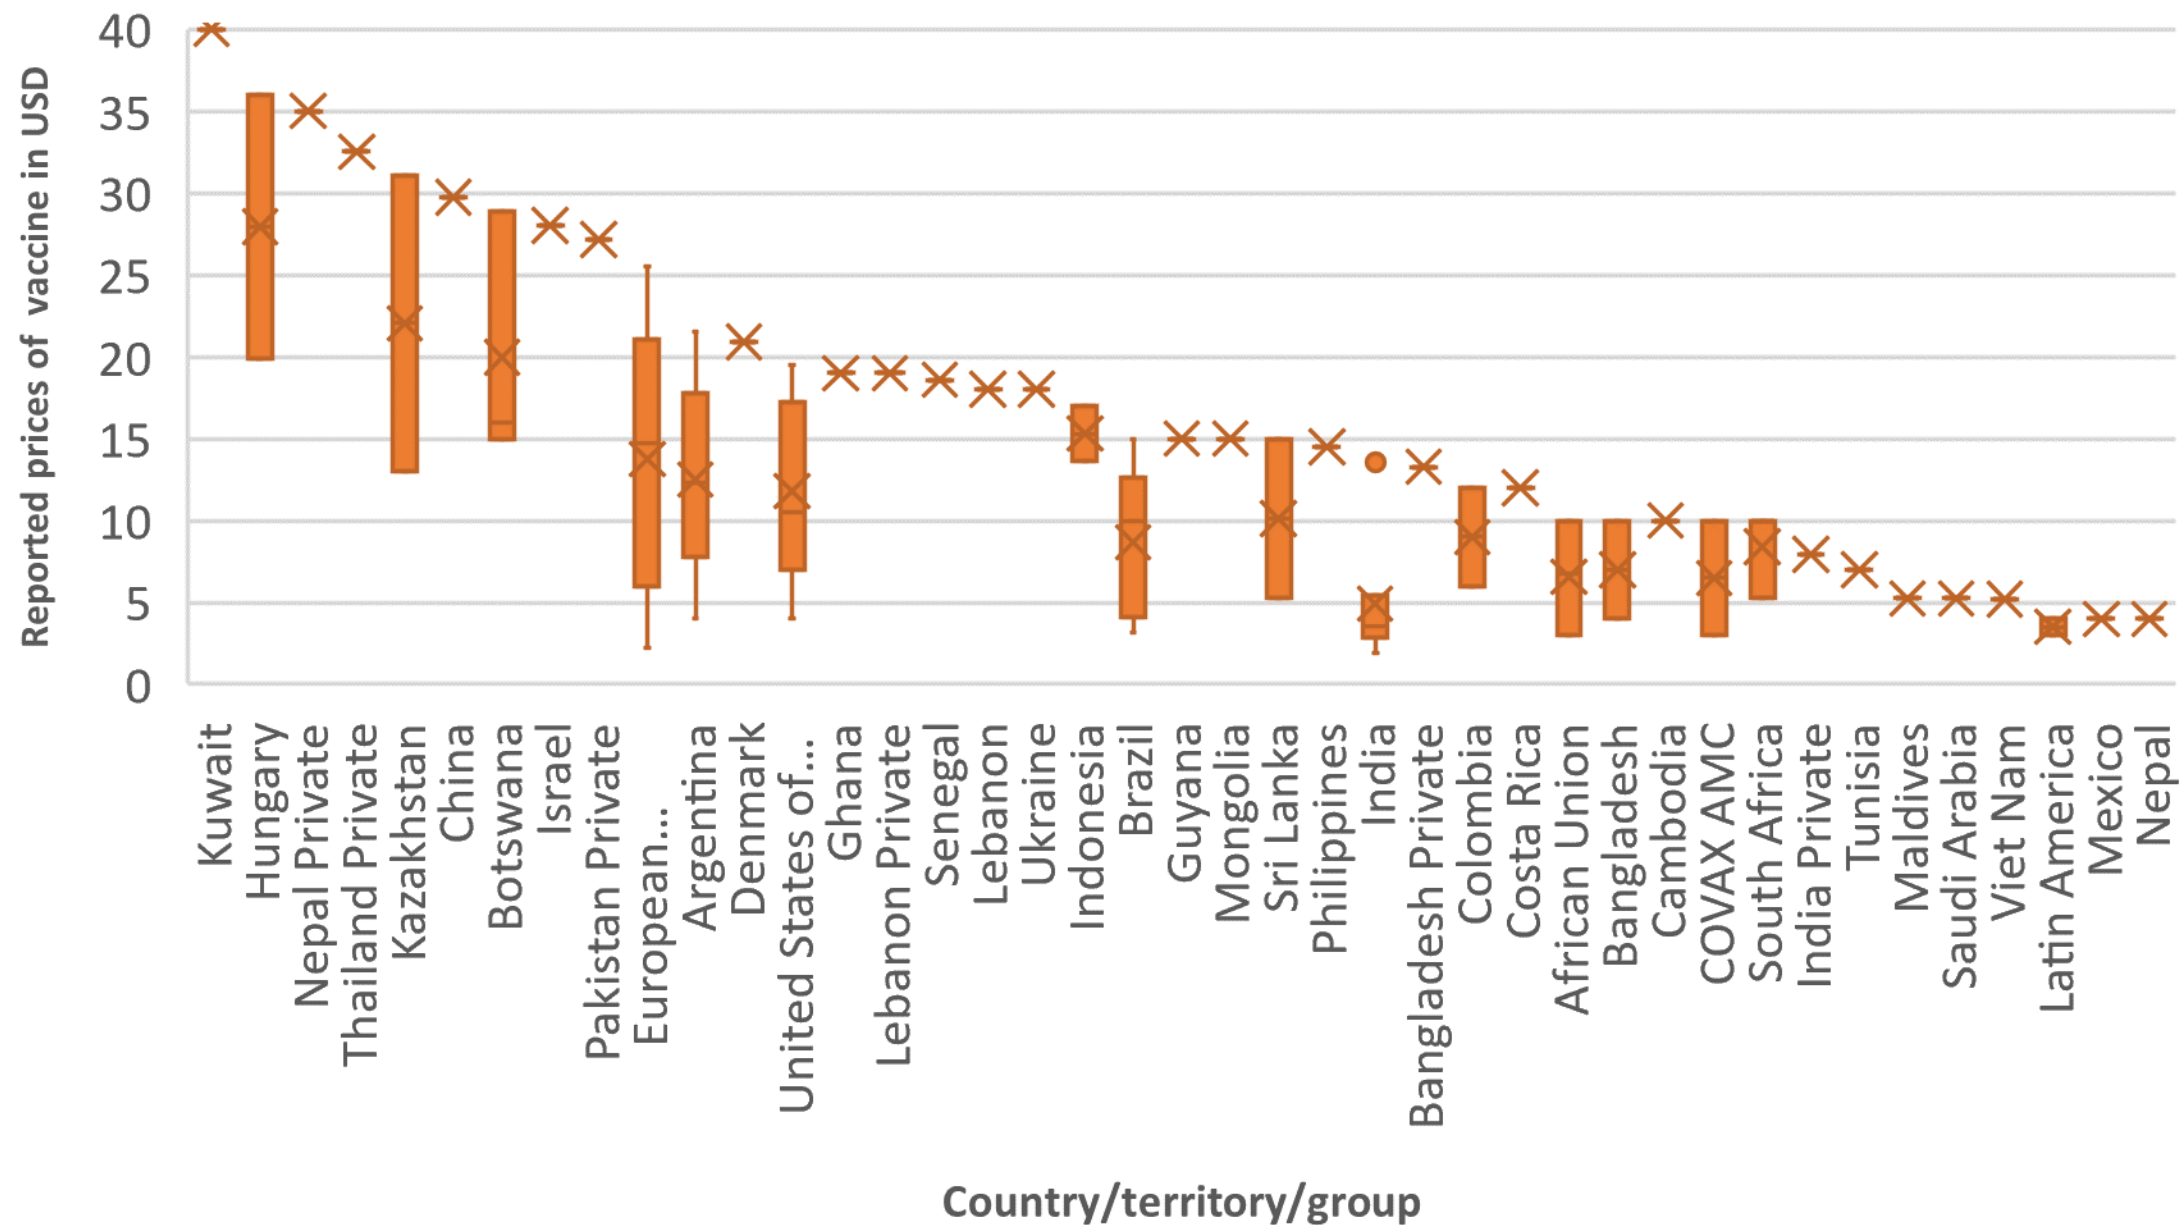

Figure S2: Unit price of vaccines for which a manufacturer agreed to supply vaccine in USD

Supplement: s1 [file s1]

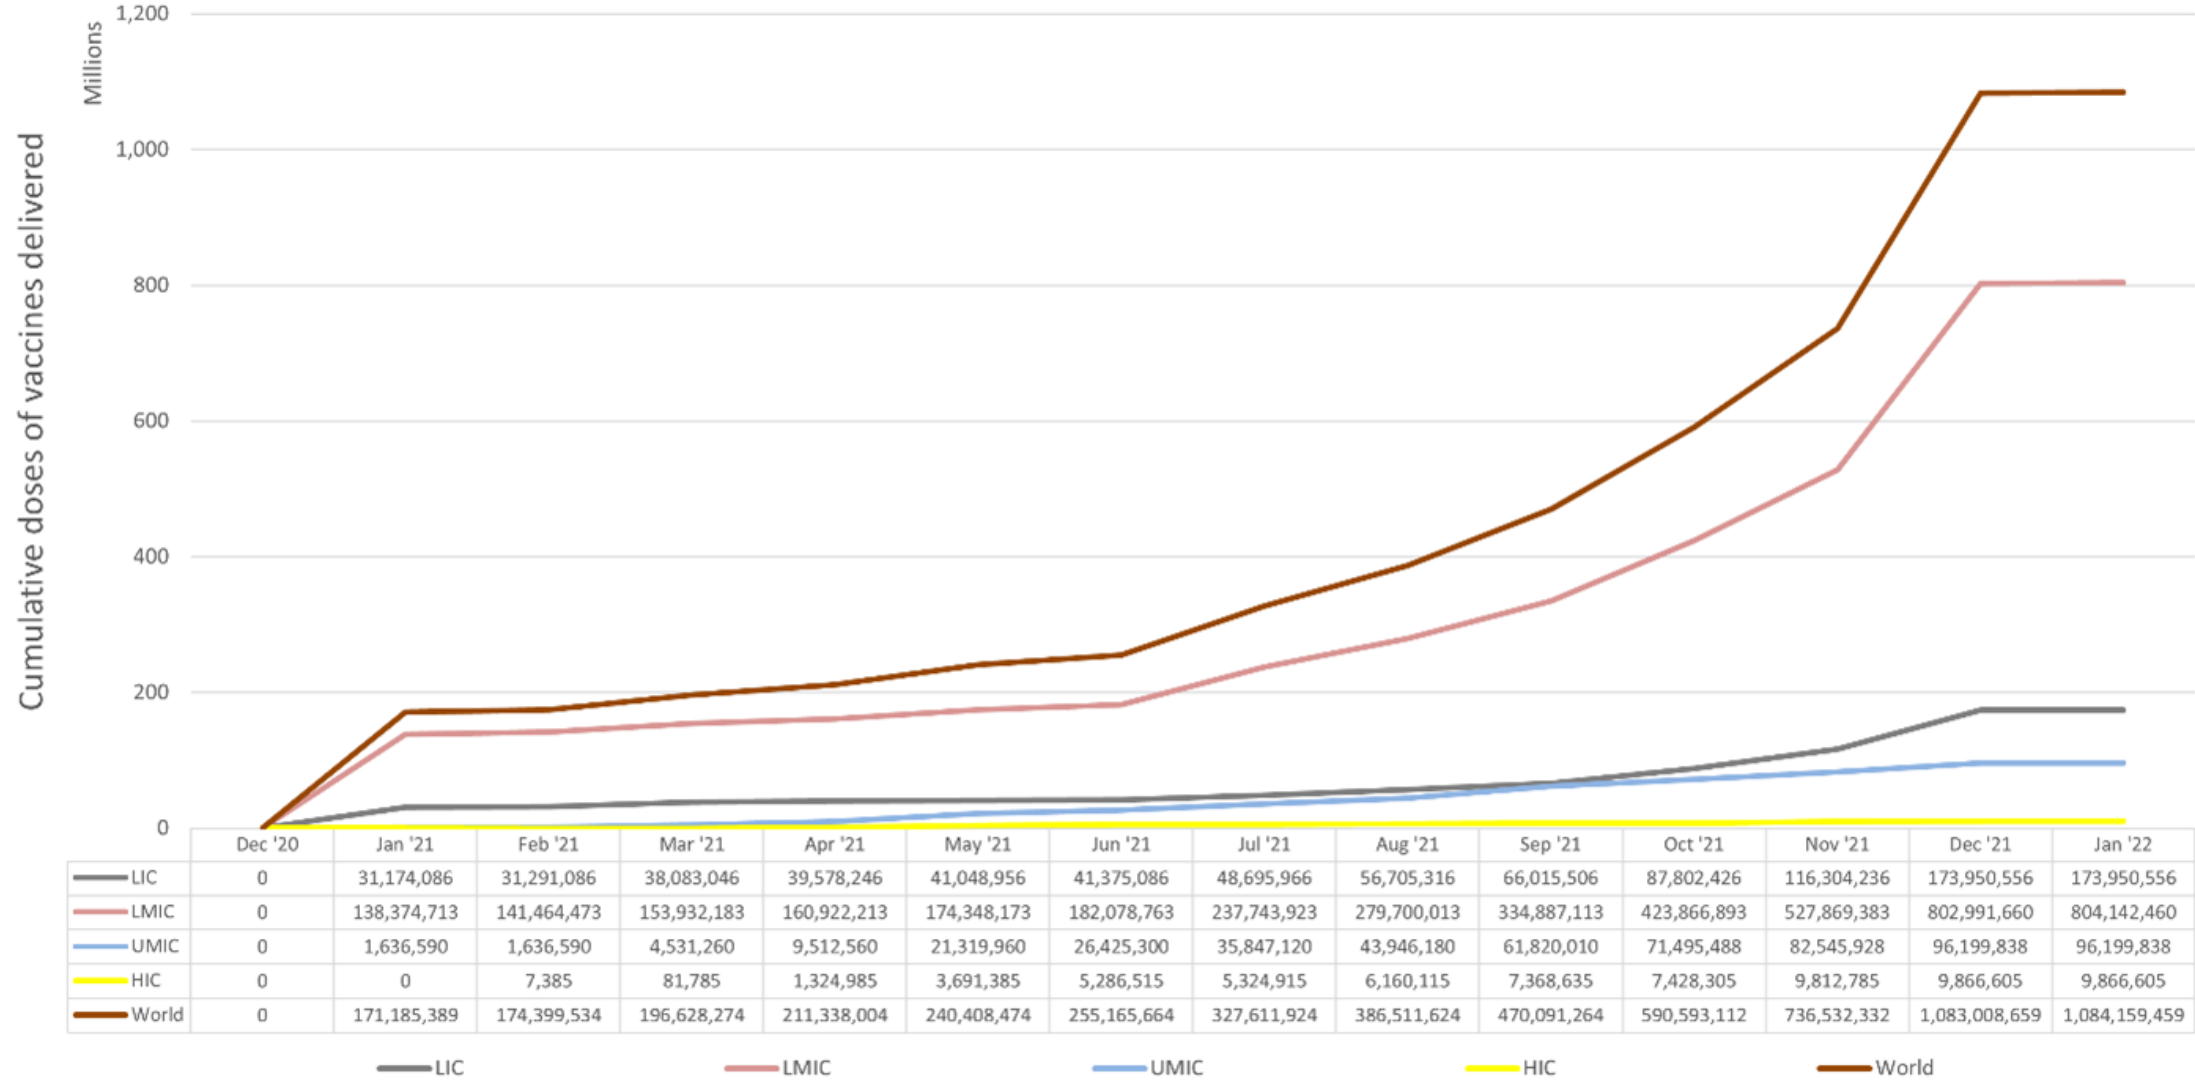

**Figure S1: Time trend analysis of vaccines delivered by COVAX**

Supplement: s1 [file s1]
